# Supplementary material for: Isolation of lactic acid bacteria bound to the porcine intestinal mucosa and an analysis of their moonlighting adhesins
Source: PubMed Central journal article supplement — Biosci Microbiota Food Health. 2016 Aug 2;35(4):185–96. doi: 10.12938/bmfh.16-012 (PMC5107636; doi:10.12938/bmfh.16-012), 2016-08-02
Supplement: bmfh-35-404-s001.pdf [file bmfh-35-404-s001.pdf]

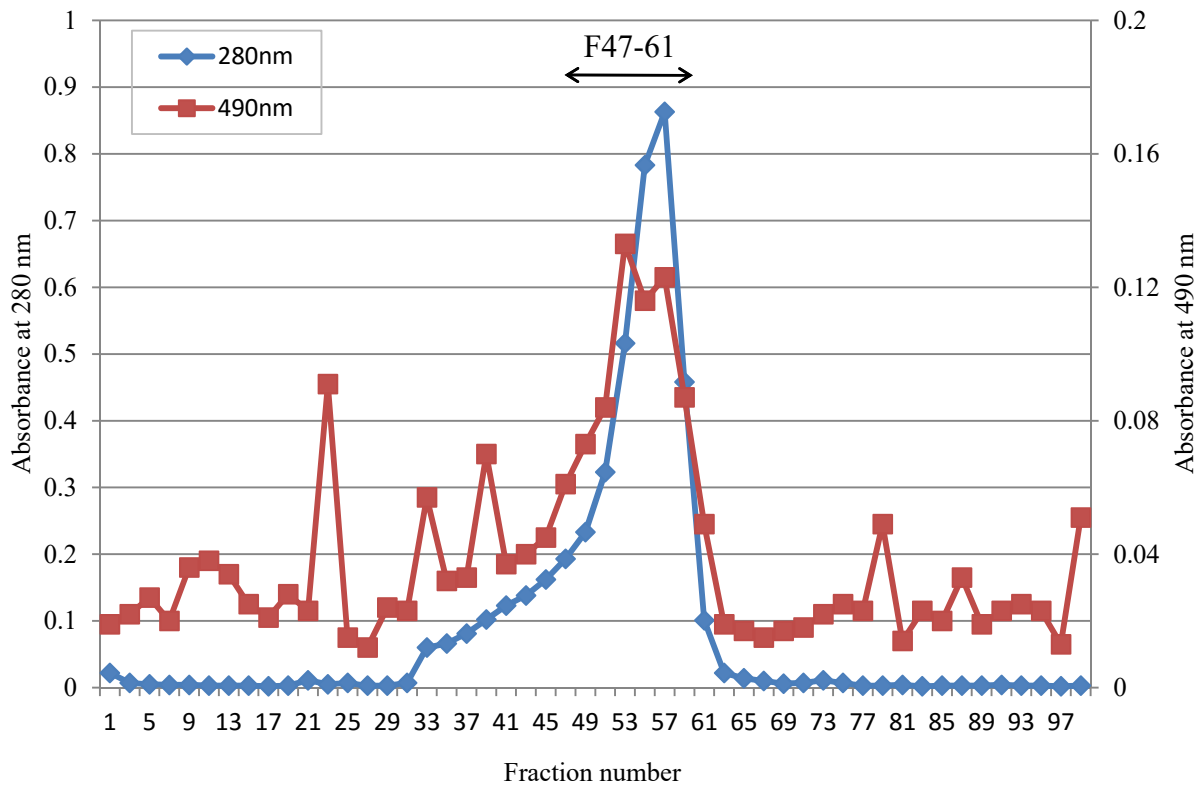

Supplemental Fig. 1. Gel filtration chromatography of PIM

Symbols: ◆, protein at 280 nm; ■, natural sugar at 490 nm. Fractions 47–61 were collected and used as purified PIM.
